# Supplementary material for: Serum-Derived Neuronal Exosomal microRNAs as Stress-Related Biomarkers in an Atopic Dermatitis Model
Source: MDPI journal article supplement (doi:10.3390/biomedicines9121764), 2021-11-25
Supplement: s1 [file s1]

Supplementary Material S1. **MicroRNA (miRNA)** sequences that were differentially expressed following atopic dermatitis.

| Mature miRNA    | Sequence (5'-3')        |
|-----------------|-------------------------|
| mmu-let-7a-5p   | UGAGGUAGUAGGUUGUAUAGUU  |
| mmu-let-7b-5p   | UGAGGUAGUAGGUUGUGUGGUU  |
| mmu-let-7c-5p   | UGAGGUAGUAGGUUGUAUGGUU  |
| mmu-let-7e-5p   | UGAGGUAGGAGGUUGUAUAGUU  |
| mmu-miR-126a-5p | CAUUAUUACUUUUGGUACGCG   |
| mmu-miR-3473b   | GGGCUGGAGAGAUGGCUCAG    |
| mmu-miR-3473e   | GGGCUGGAGAGAUGGCUCGUA   |
| mmu-miR-466i-5p | UGUGUGUGUGUGUGUGUGUG    |
| mmu-miR-5128    | CAAUUGGGGCUGGCGAGAUGGCU |
| mmu-let-7i-5p   | UGAGGUAGUAGUUUGUGCUGUU  |
| mmu-miR-130a-3p | CAGUGCAAUGUUAAAAGGGCAU  |
| mmu-miR-140-3p  | UACCACAGGGUAGAACCACGG   |
| mmu-miR-142a-3p | UGUAGUGUUUCCUACUUUAUGGA |
| mmu-miR-16-5p   | UAGCAGCACGUAAAUAUUGGCG  |
| mmu-miR-17-5p   | CAAAGUGCUUACAGUGCAGGUAG |
| mmu-miR-185-5p  | UGGAGAGAAAGGCAGUUCCUGA  |
| mmu-miR-19b-3p  | UGUGCAAUCCAUGCAAAACUGA  |
| mmu-miR-24-3p   | UGGCUCAGUUCAGCAGGAACAG  |
| mmu-miR-27a-5p  | AGGGCUUAGCUGCUUGUGAGCA  |
| mmu-miR-29a-3p  | UAGCACCAUCUGAAAUCGGUUA  |
| mmu-miR-301a-3p | CAGUGCAAUAGUAUUGUCAAGC  |
| mmu-miR-451a    | AAACCGUUACCAUACUGAGUU   |
| mmu-miR-669s-3p | ACAUAACAUACACACACACGUAU |
| mmu-miR-669o-3p | ACAUAACAUACACACACACGUAU |
| mmu-miR-93-5p   | CAAAGUGCUGUUCGUGCAGGUAG |
