# Supplementary material for: Serum-Derived Neuronal Exosomal microRNAs as Stress-Related Biomarkers in an Atopic Dermatitis Model
Source: MDPI journal article supplement (doi:10.3390/biomedicines9121764), 2021-11-25

Supplementary Figure S3. Gene ontology (GO) analysis and Kyoto Encyclopedia of Genes and Genomes (KEGG) pathway analysis indicating that neuronal exosomal miRNAs with different expression patterns under atopic dermatitis.

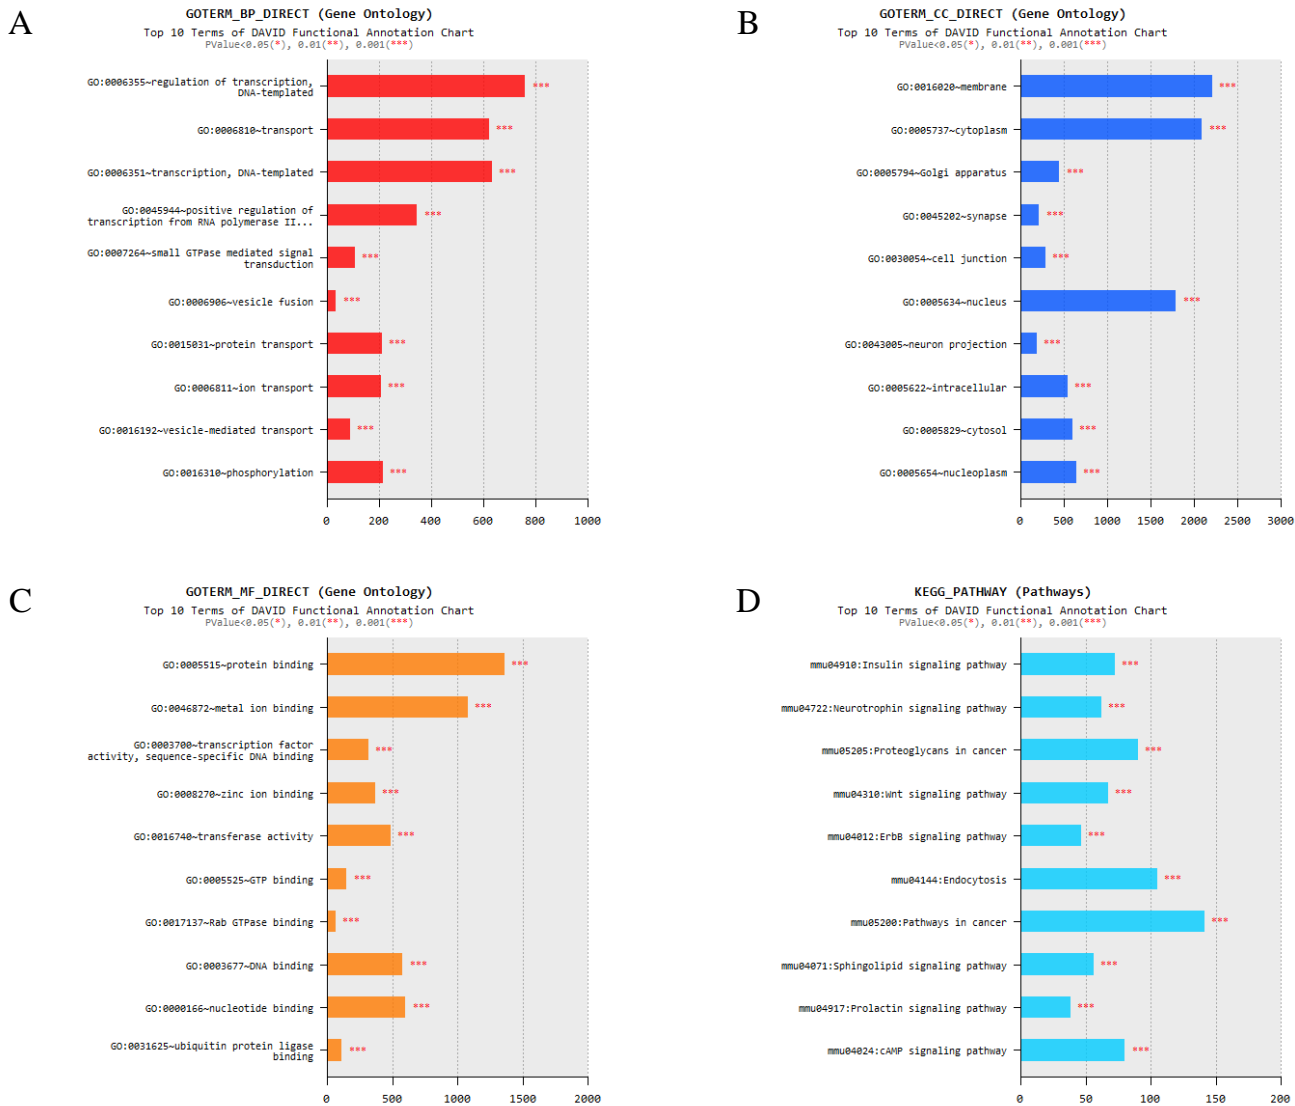

Supplement: s1 [file s1]
